# Supplementary material for: Structural basis of agonist specificity of α1A-adrenergic receptor
Source: PubMed Central journal article supplement (PMC10415349; doi:10.1038/s41467-023-40524-2), 2023-08-10
Supplement: 41467_2023_40524_MOESM1_ESM.pdf [file 41467_2023_40524_MOESM1_ESM.pdf]

# A61603- $\alpha_{1A}$ -AR-Gq cryo-EM data processing

**a**

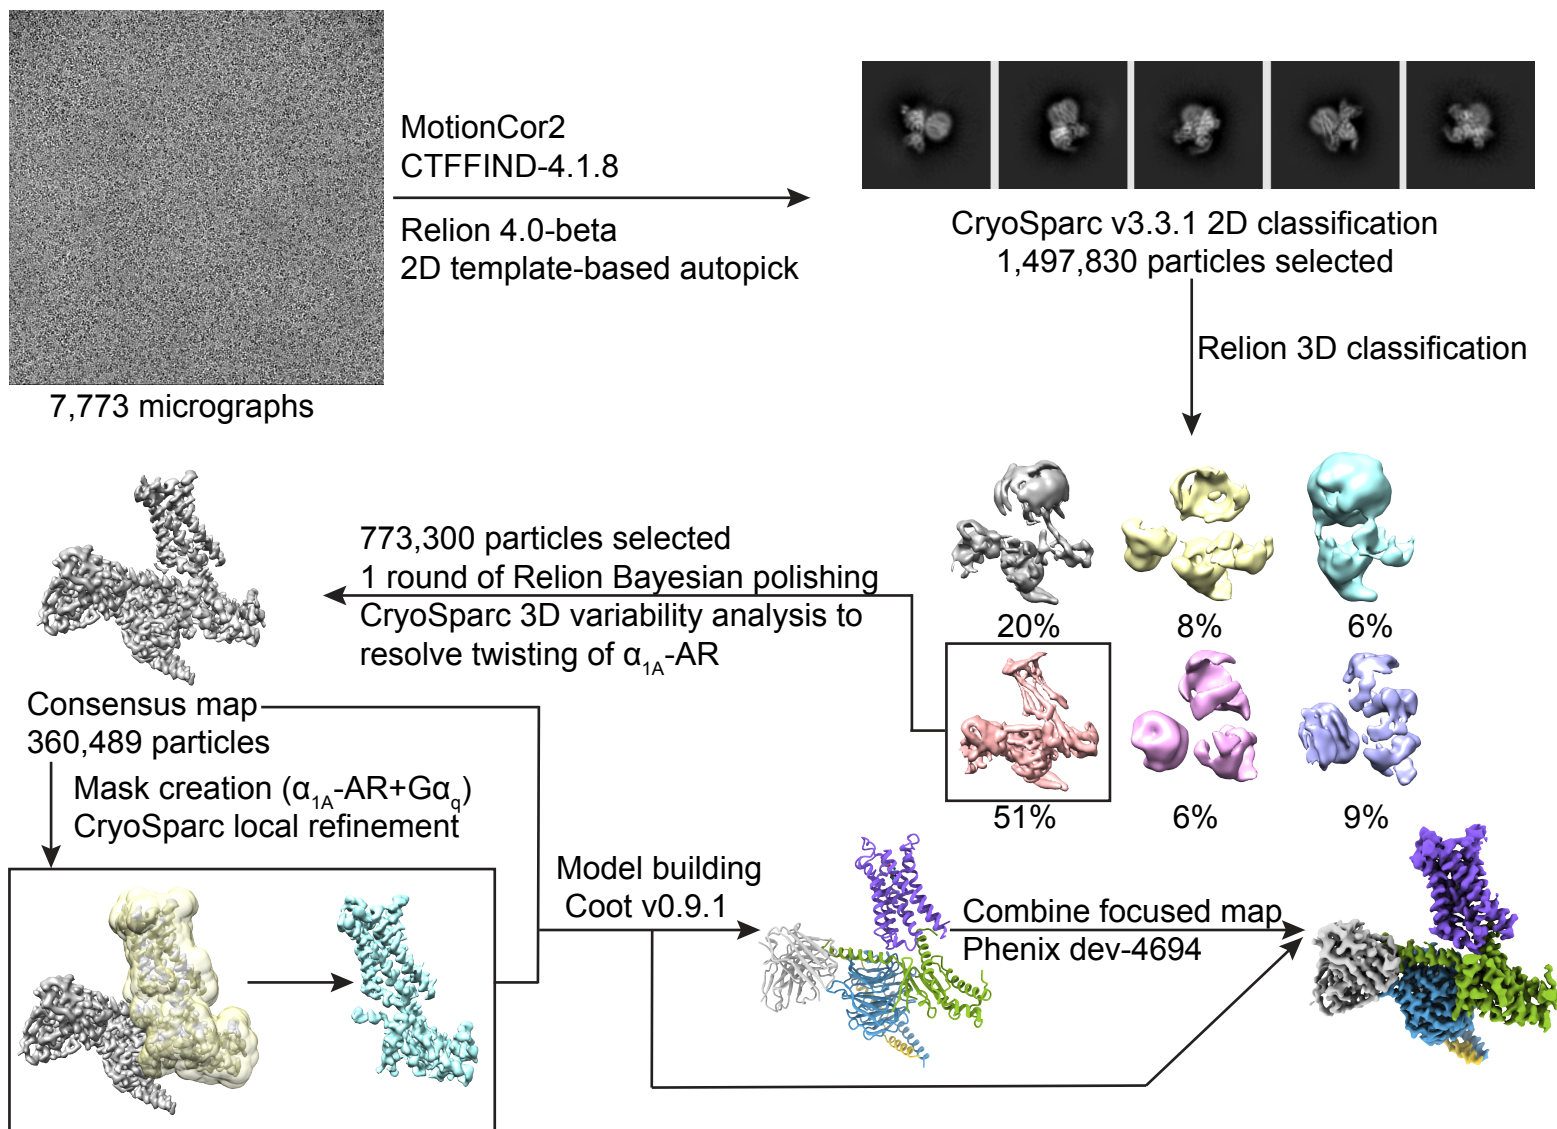

**b**

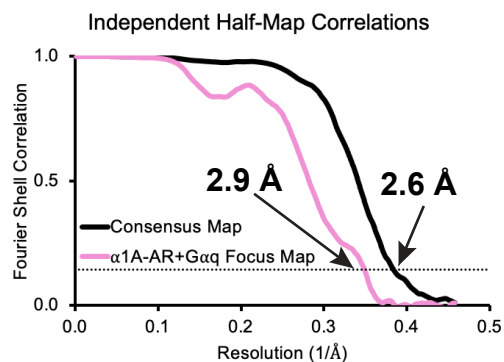

**c**

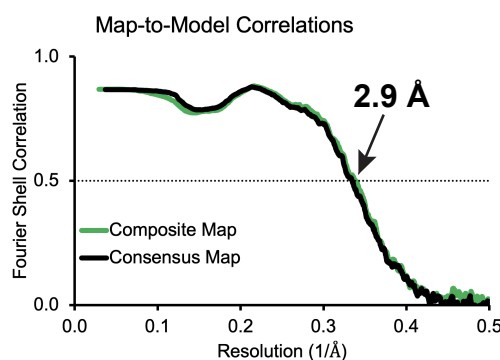

**d**

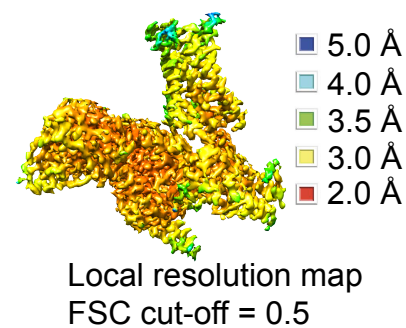

## Supplementary Figure 1. A61603- $\alpha_{1A}$ -AR-Gq cryo-EM data processing.

**a**, Cryo-EM data processing workflow of A61603- $\alpha_{1A}$ -AR-Gq complex. **b**, Fourier shell correction curves of consensus map and  $\alpha_{1A}$ -AR and G $\alpha_q$  focus map. **c**, Cross-validation of consensus and composite maps to A61603- $\alpha_{1A}$ -AR-Gq complex model. **d**, Local resolution of consensus map.

# Epinephrine- $\alpha_{1A}$ -AR-Gq cryo-EM data processing

**a**

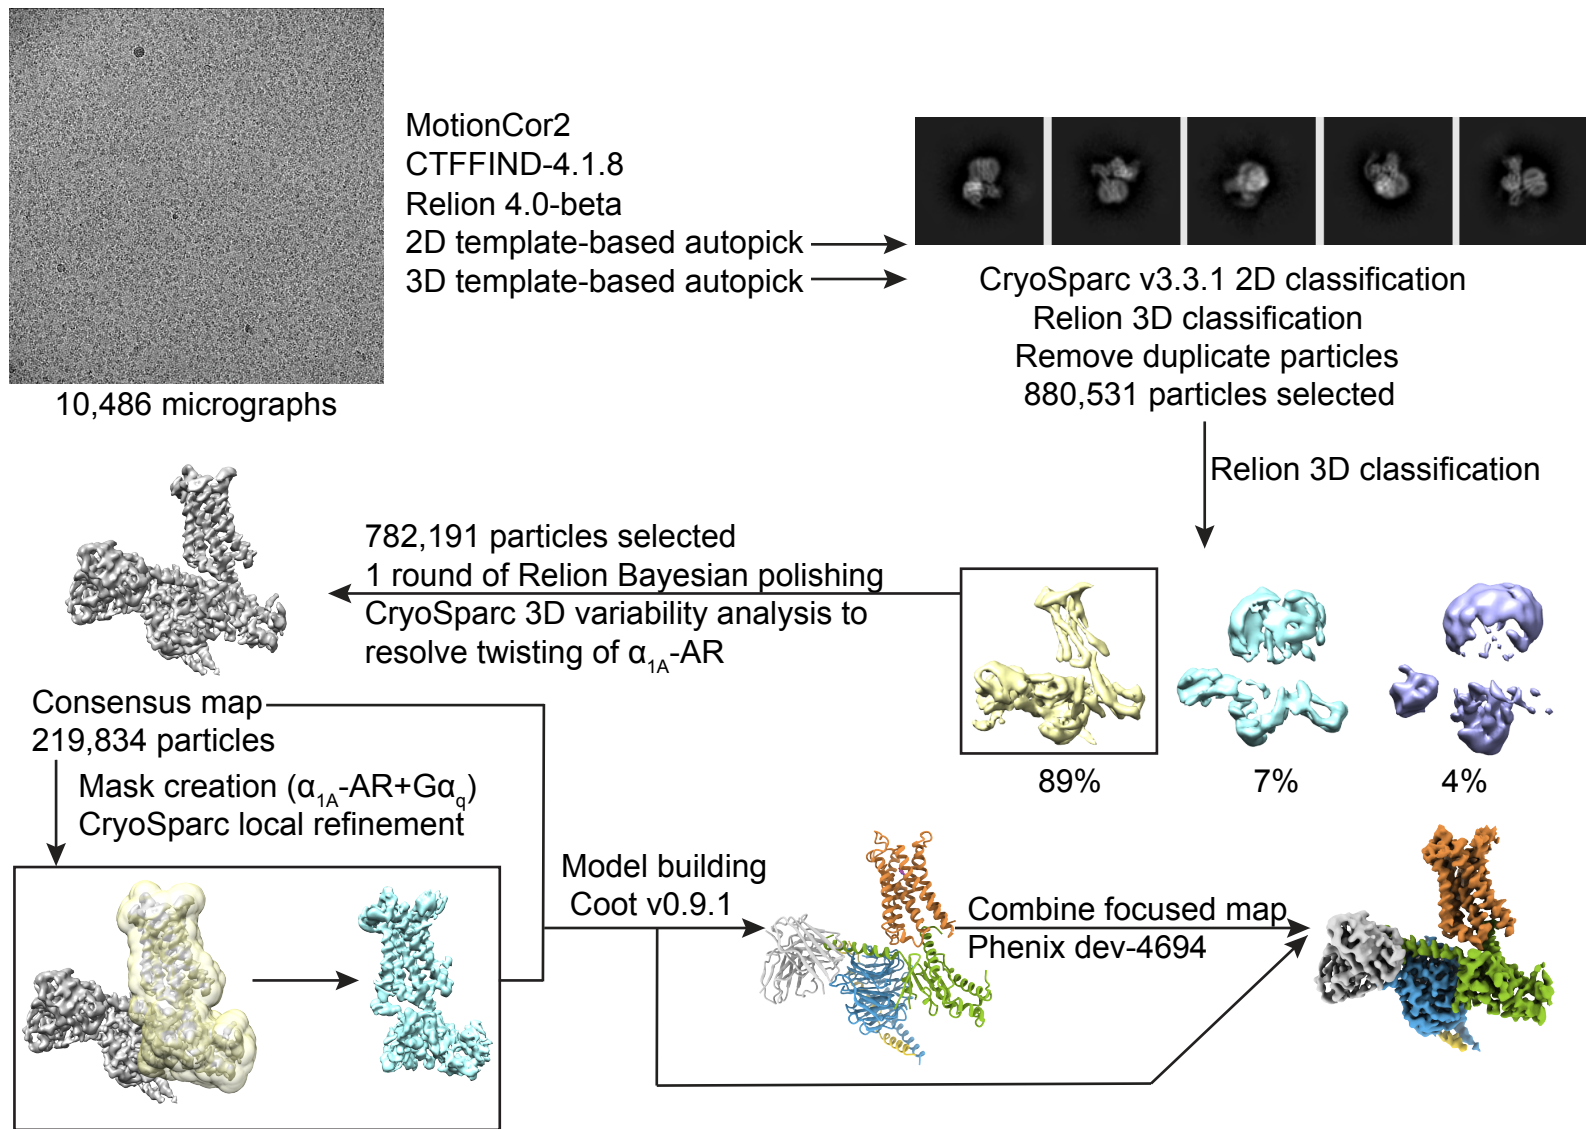

**b**

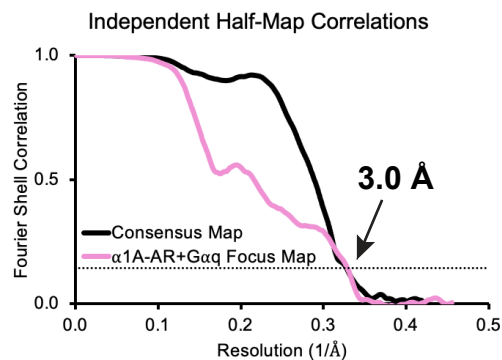

**c**

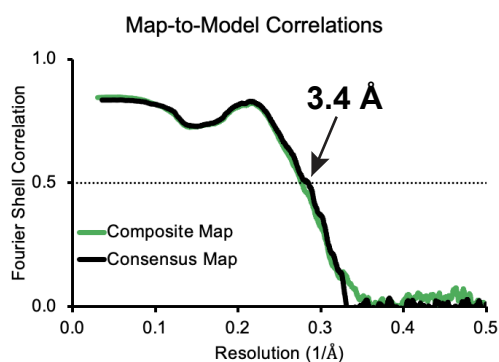

**d**

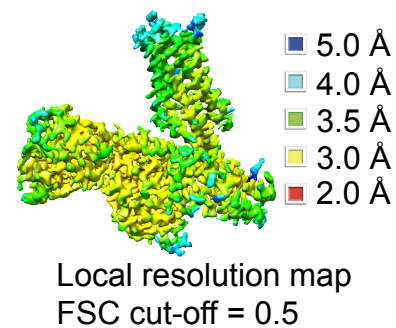

## Supplementary Figure 2. Epinephrine- $\alpha_{1A}$ -AR-Gq cryo-EM data processing.

**a**, Cryo-EM data processing workflow of epinephrine- $\alpha_{1A}$ -AR-Gq complex. **b**, Fourier shell correction curves of consensus map and  $\alpha_{1A}$ -AR and G $\alpha_q$  focus map. **c**, Cross-validation of consensus and composite maps to epinephrine- $\alpha_{1A}$ -AR-Gq complex model. **d**, Local resolution of consensus map.

**a** A61603- $\alpha_{1A}$ -AR-Gq complex

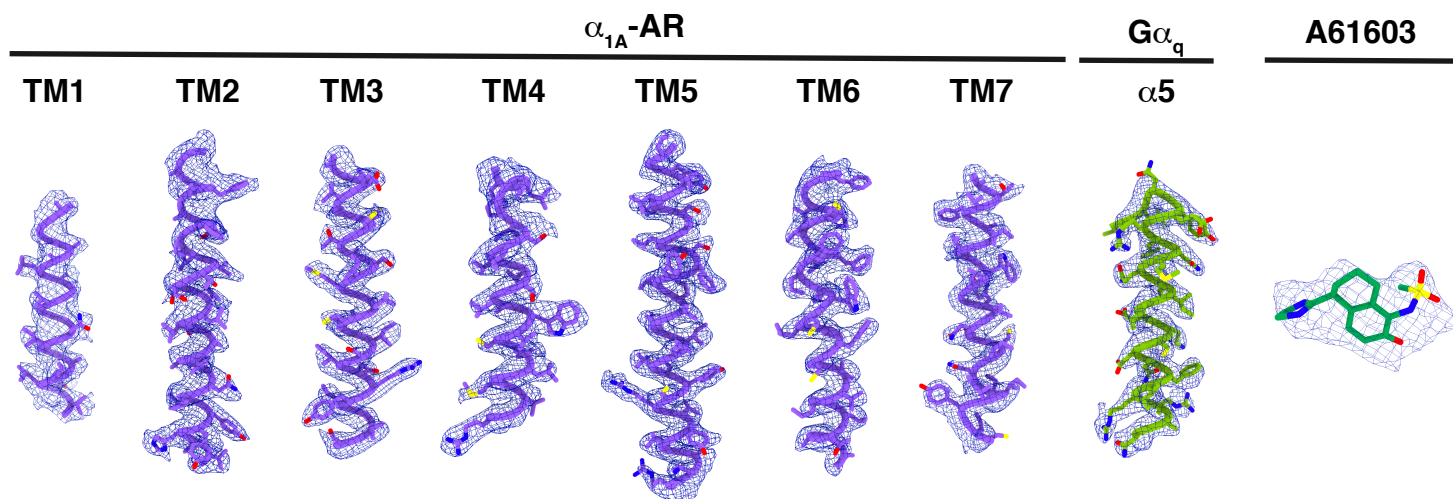

**b** Epinephrine- $\alpha_{1A}$ -AR-Gq complex

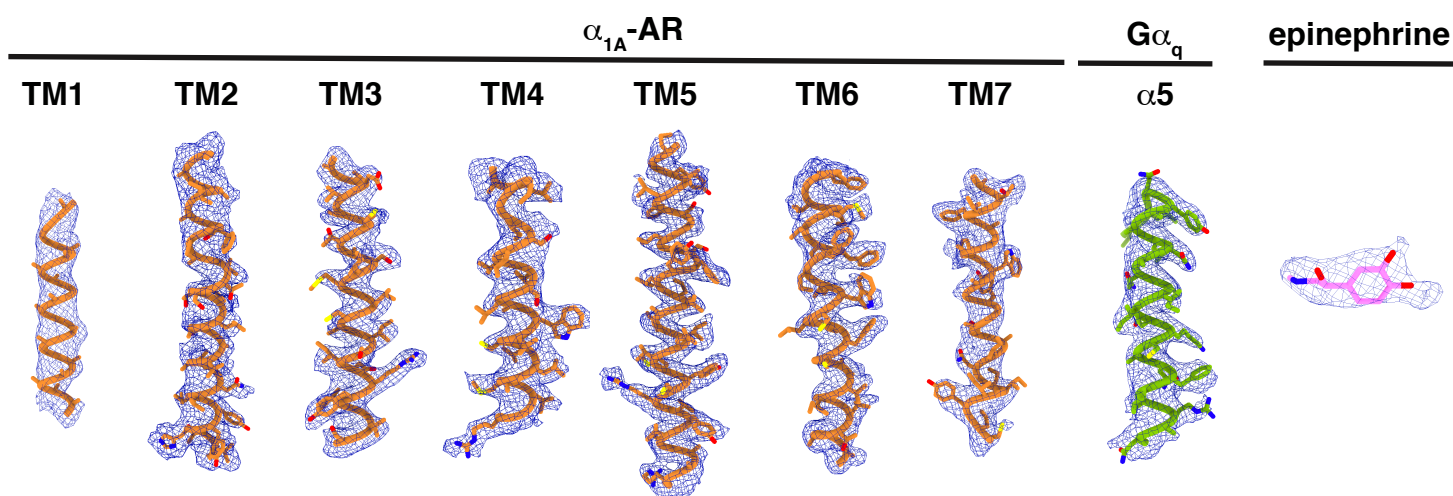

**Supplementary Figure 3. Cryo-EM maps versus refined structures.**

Cryo-EM density maps and models are shown for all seven transmembrane  $\alpha$ -helices of  $\alpha_{1A}$ -AR and  $\alpha 5$ -helix of  $G\alpha_q$ , of A61603- $\alpha_{1A}$ -AR- $G_q$  complex **(a)** and epinephrine- $\alpha_{1A}$ -AR- $G_q$  complex **(b)**.

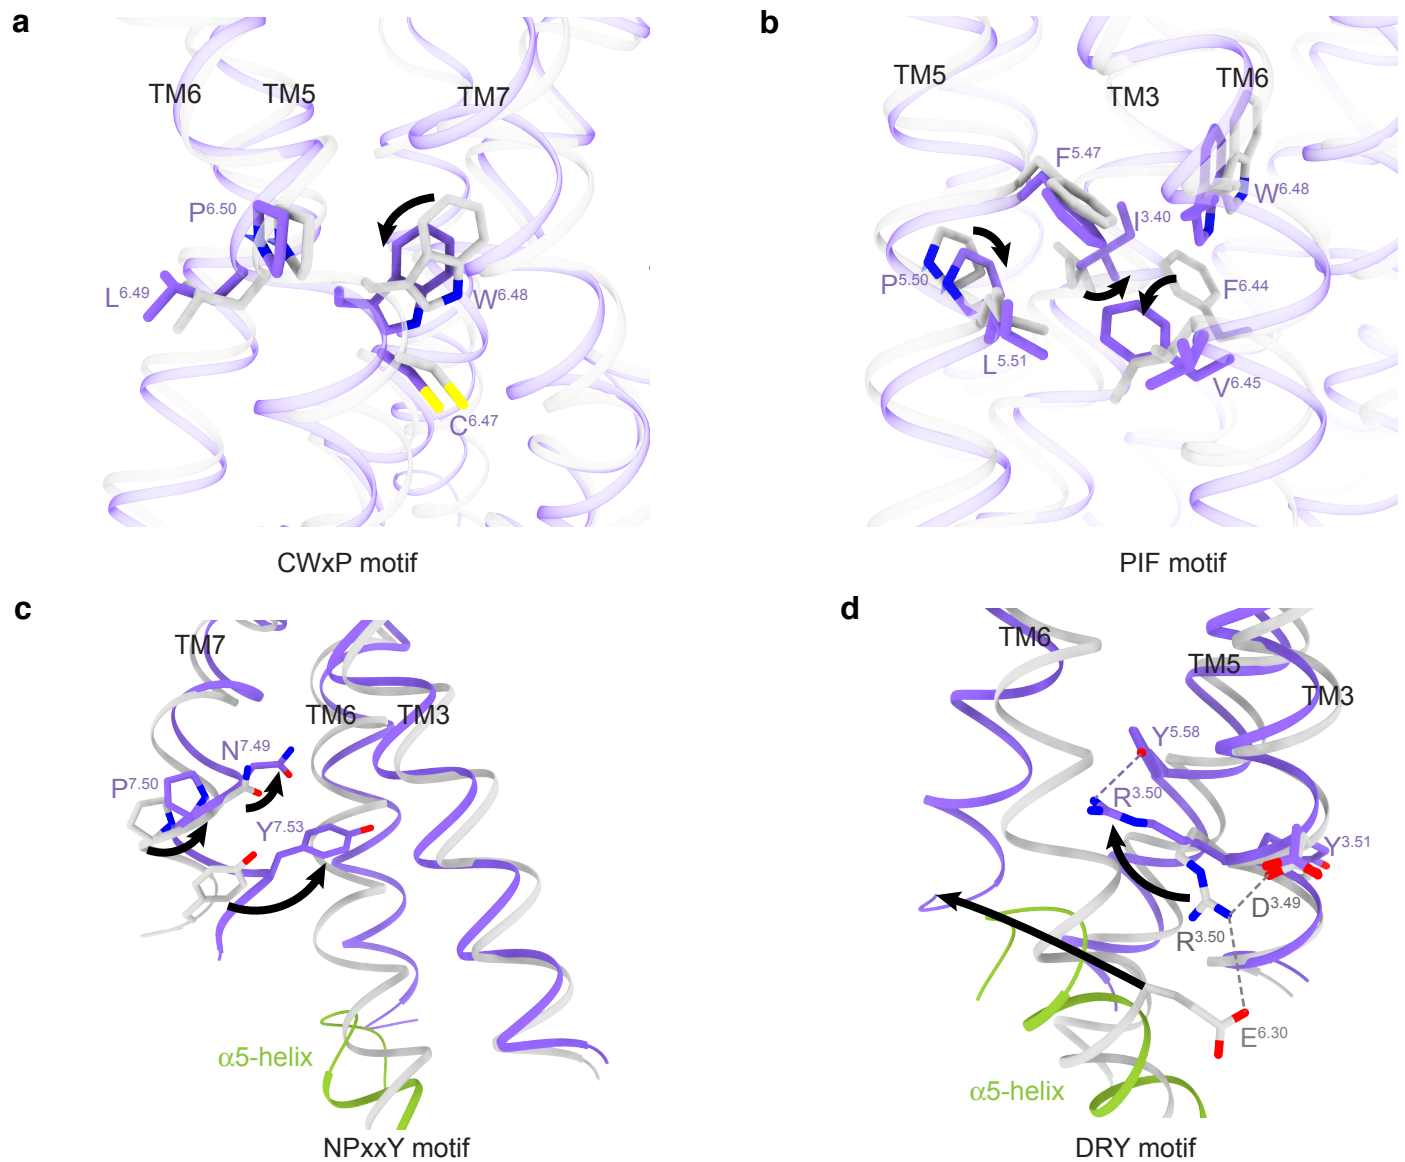

**Supplementary Figure 4. Conformational changes of  $\alpha_1$ -AR during the activation.**

Structural comparisons of the inactive state  $\alpha_{1B}$ -AR (grey; PDB 7B6W) and the active state of  $\alpha_{1A}$ -AR in complex with Gq (this work) are shown. **(a)** The conformational changes of the CWxP motif during  $\alpha_1$ -AR activation are shown. **(b)** The conformational changes of the PIF motif during  $\alpha_1$ -AR activation are shown. **(c)** Movement of Y<sup>7.53</sup> within the NPxxY motif. **(d)** The conformational changes in the DRY motif.

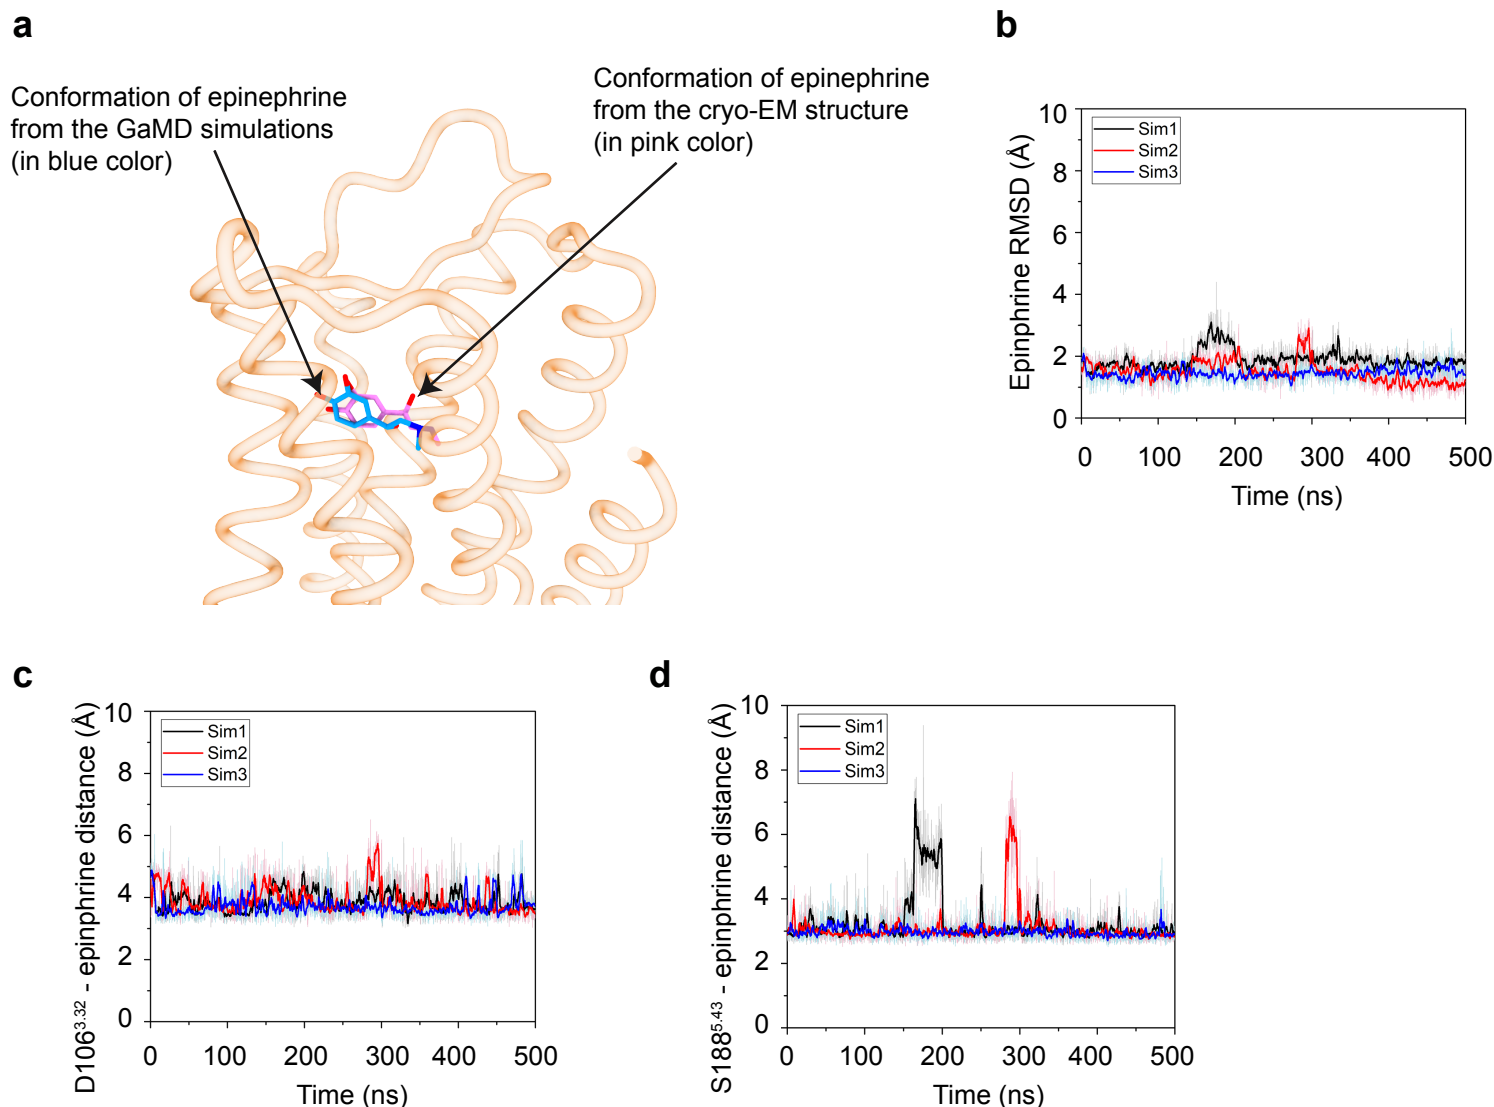

**Supplementary Figure 5. GaMD simulations of epinephrine.**

(a) Comparison of the conformations of epinephrine in the cryo-EM structure (in pink color) and from GaMD simulations (in blue color). (b) The epinephrine RMSD by comparing the conformations of epinephrine in the cryo-EM structure and from GaMD simulations. (c,d) time courses of the distances between epinephrine and specific residues of  $\alpha_{1A}$ -AR were calculated from the GaMD simulations: between the CG atom of D106<sup>3.32</sup> and N1 atom of epinephrine (c), and between the OG atom of S188<sup>5.43</sup> and O2 atom of epinephrine (d). Three independent 500 ns GaMD simulations are shown for each condition.

**a. Complex of epinephrine- $\beta_1$ -AR-nanobody 6B9**

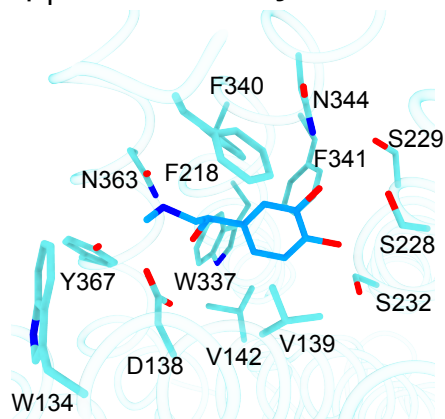

**b. Comparison of epinephrine in complex with  $\alpha_{1A}$ -AR and with  $\beta_1$ -AR**

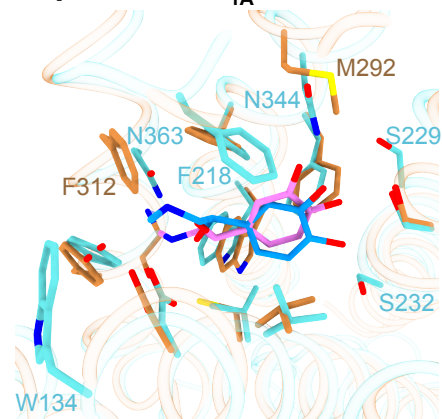

**c. Complex of epinephrine- $\beta_2$ -AR-nanobody 6B9**

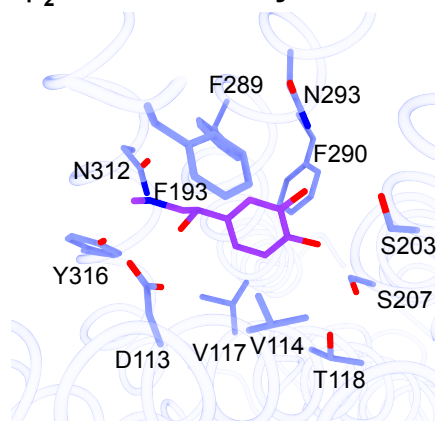

**d. Comparison of epinephrine in complex with  $\alpha_{1A}$ -AR and with  $\beta_2$ -AR**

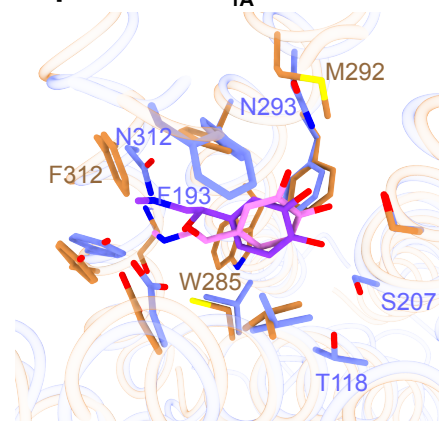

**Supplementary Figure 6. Different conformations of epinephrine.**

**(a)** epinephrine in the complex of epinephrine- $\beta_1$ -AR-nanobody 6B9. **(b)** Comparison of epinephrine in complex with  $\alpha_{1A}$ -AR and with  $\beta_1$ -AR. **(c)** Epinephrine in the complex of epinephrine- $\beta_2$ -AR-nanobody 6B9. **(d)** Comparison of epinephrine in complex with  $\alpha_{1A}$ -AR and with  $\beta_2$ -AR.

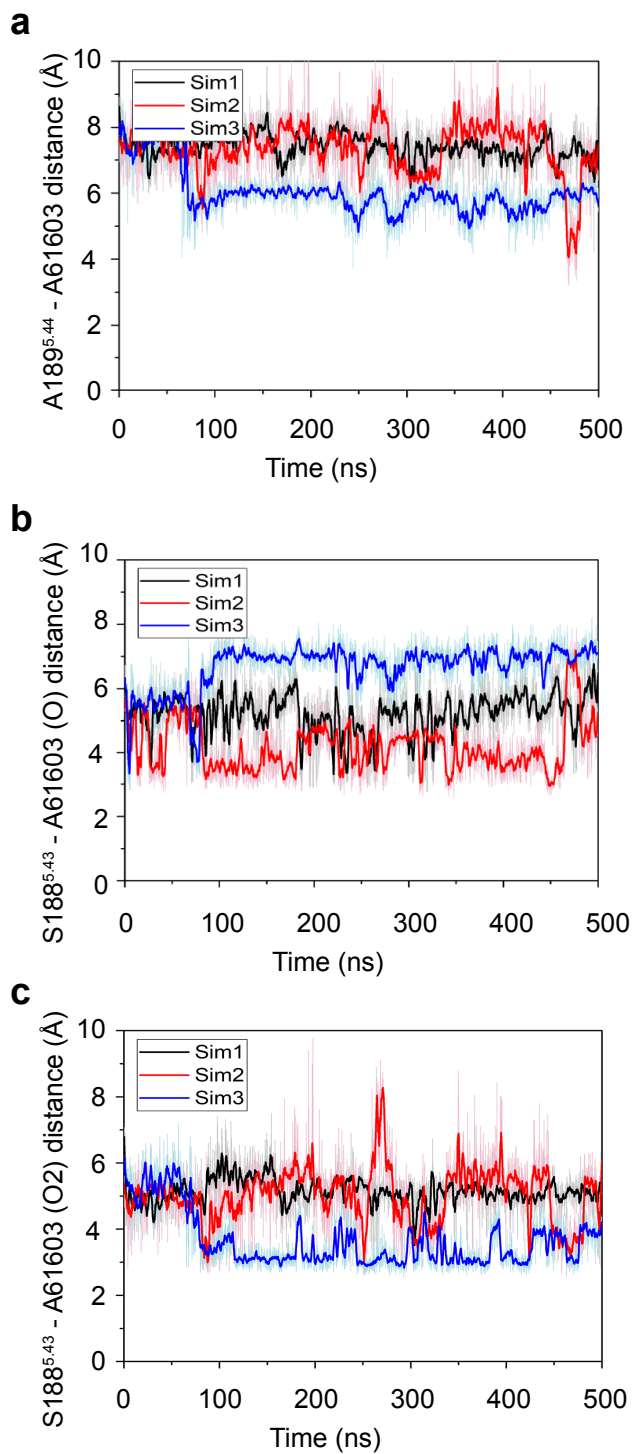

### Supplementary Figure 7. GaMD simulations of A61603.

Time courses of the distances between A61603 and specific residues of  $\alpha_{1A}$ -AR were calculated from the GaMD simulations: the N atom of A189<sup>5.44</sup> and the O2 atom of A61603 (**a**), the OG atom of S188<sup>5.43</sup> and the O atom of A61603 (**b**), and the OG atom of S188<sup>5.43</sup> and the O2 atom of A61603 (**c**). Three independent 500 ns GaMD simulations are shown for each condition.

**a. Phylogenetic tree of all human ARs**

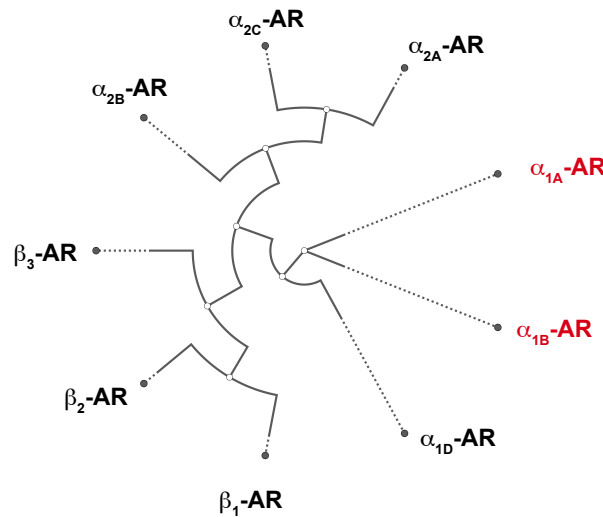

**b. Most of A61603 interacting residues are conserved in  $\alpha_1$ -ARs**

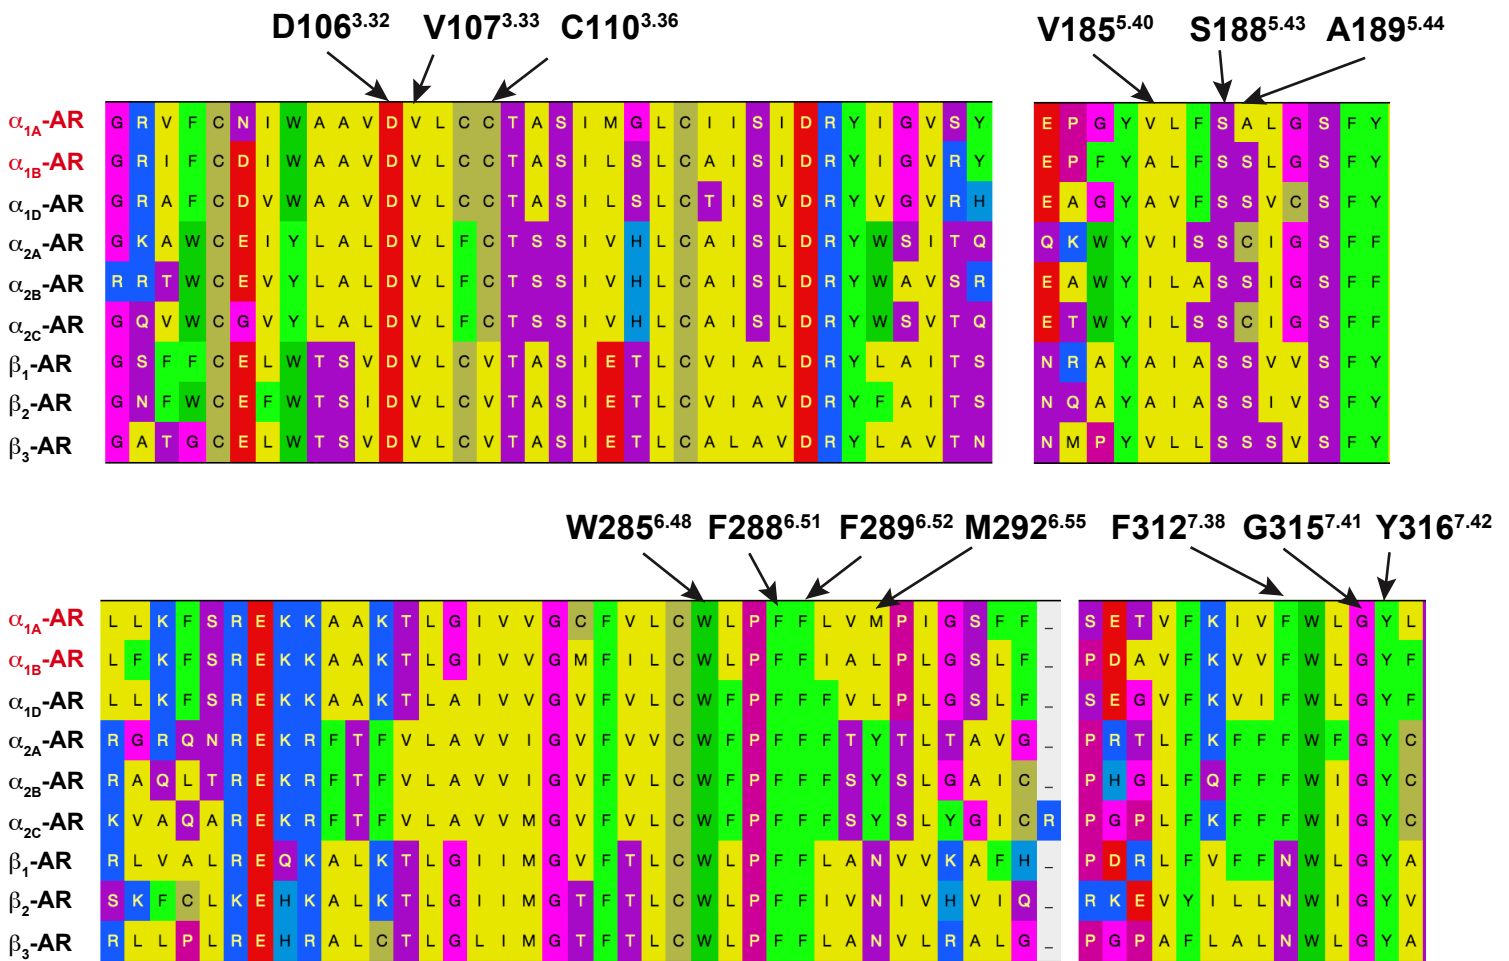

**Supplementary Figure 8. Conservation assessments of all human ARs.**

(a) Phylogenetic tree of all human ARs. (b) Structure-based sequence alignment of all human ARs generated in GPCRdb. A61603 interacting residues are labeled. As the sequence alignment indicated, most of A61603 interacting residues are conserved in  $\alpha_1$ -ARs.



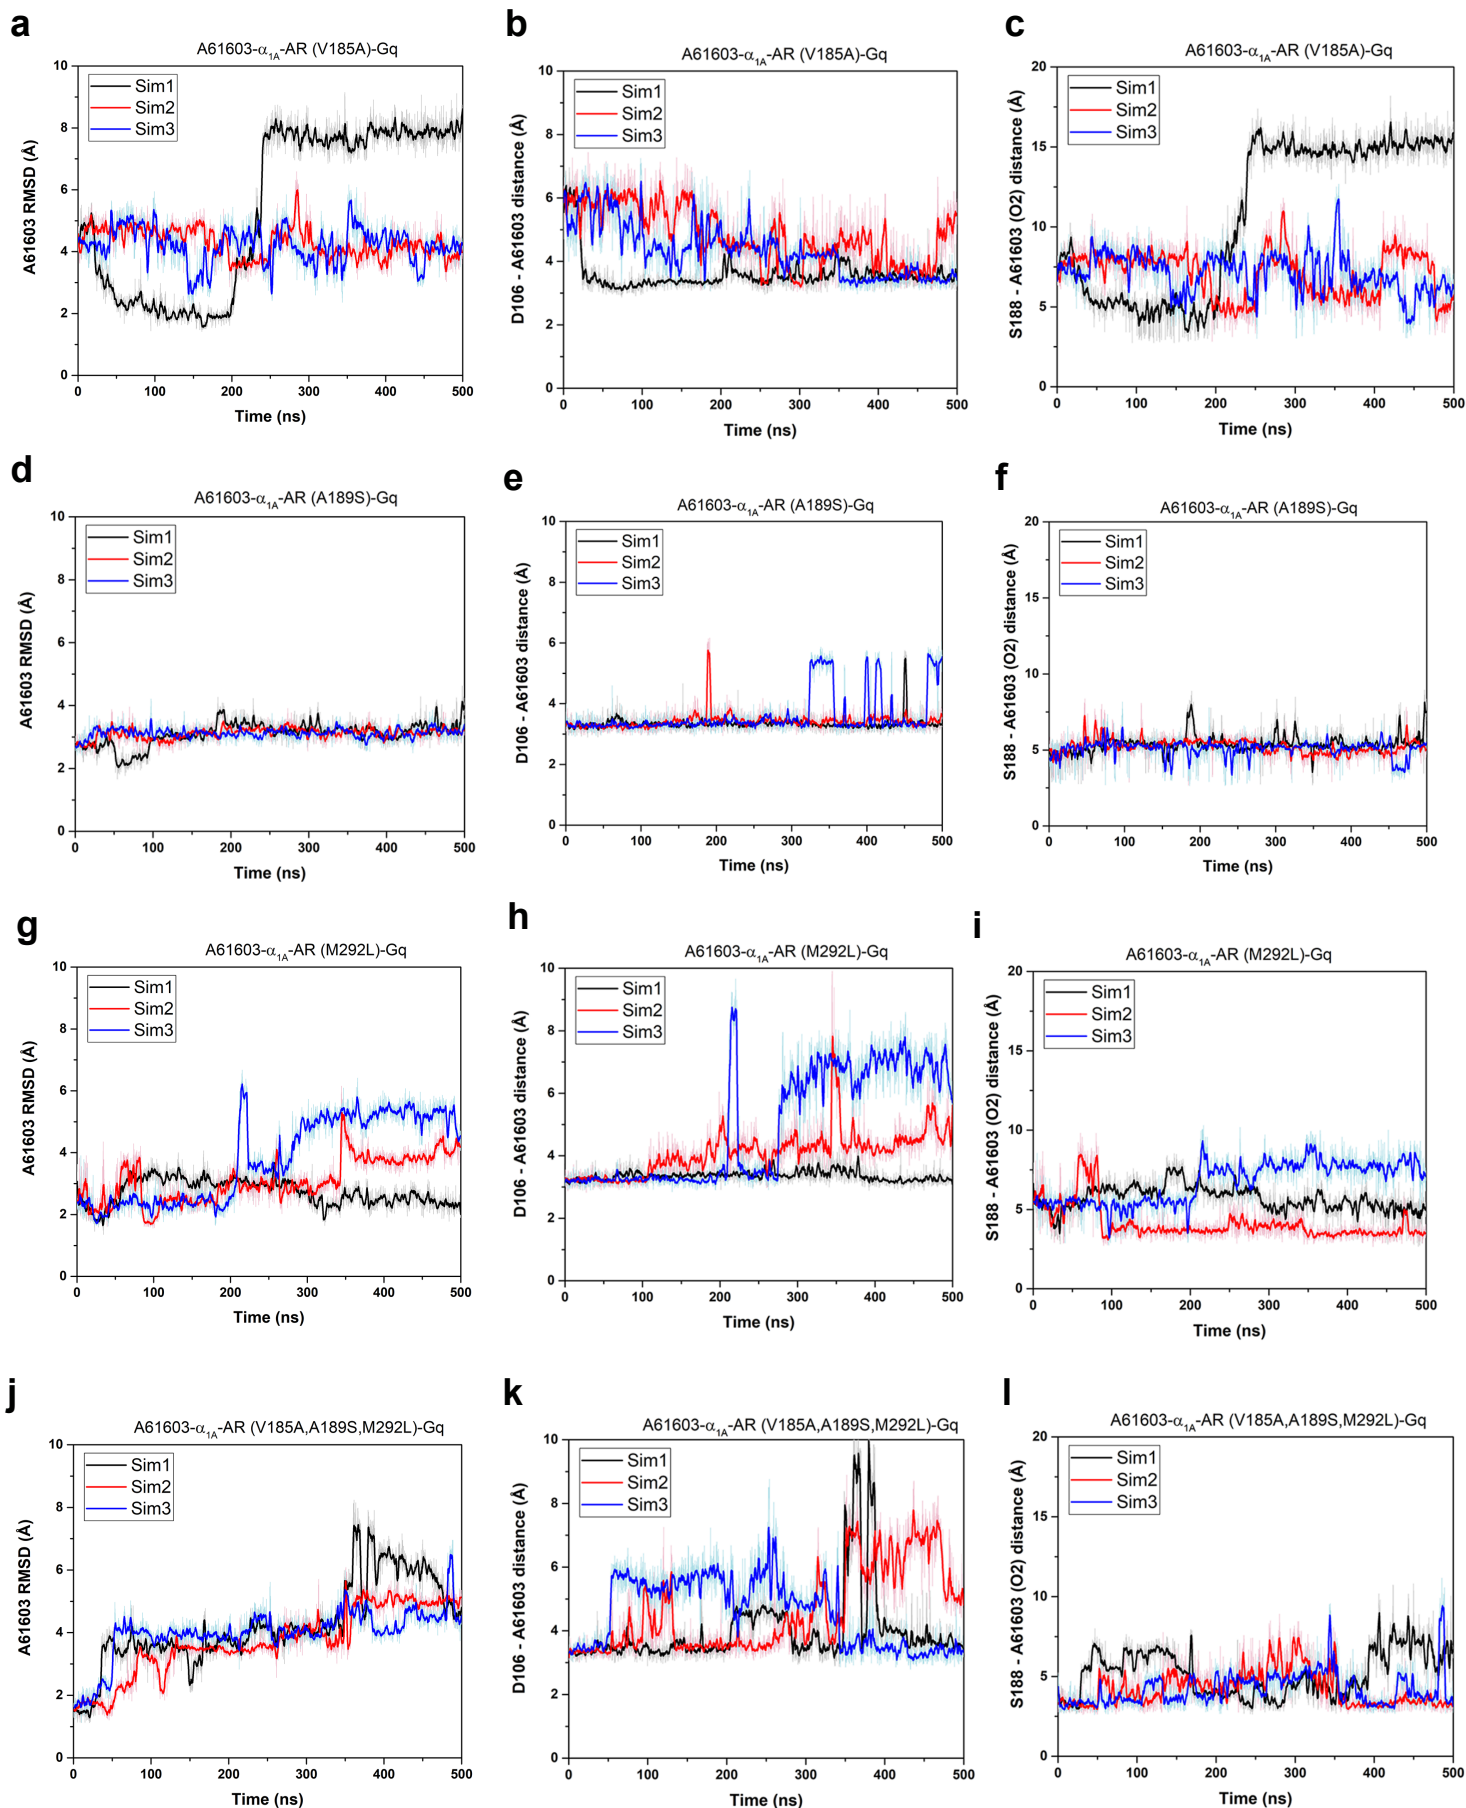

### Supplementary Figure 9. GaMD simulations of A61603 in complexes with mutant $\alpha_{1A}$ -ARs.

Time courses of A61603 RMSDs relative to the initial structures in the systems of  $\alpha_{1A}$ -AR(V185A) (**a-c**),  $\alpha_{1A}$ -AR(A189S) (**d-f**),  $\alpha_{1A}$ -AR(M292L) (**g-i**), and  $\alpha_{1A}$ -AR(V185A,A189S,M292L) (**j-l**). Time courses of the distances between A61603 and specific residues of mutant  $\alpha_{1A}$ -ARs were calculated from the GaMD simulations: the CG atom of D106<sup>3,32</sup> and the N2 atom of A61603 (**b,e,h,k**), and the OG atom of S188<sup>5,43</sup> and the O2 atom of A61603 (**c,f,i,l**). Three independent 500 ns GaMD simulations are shown for each condition.

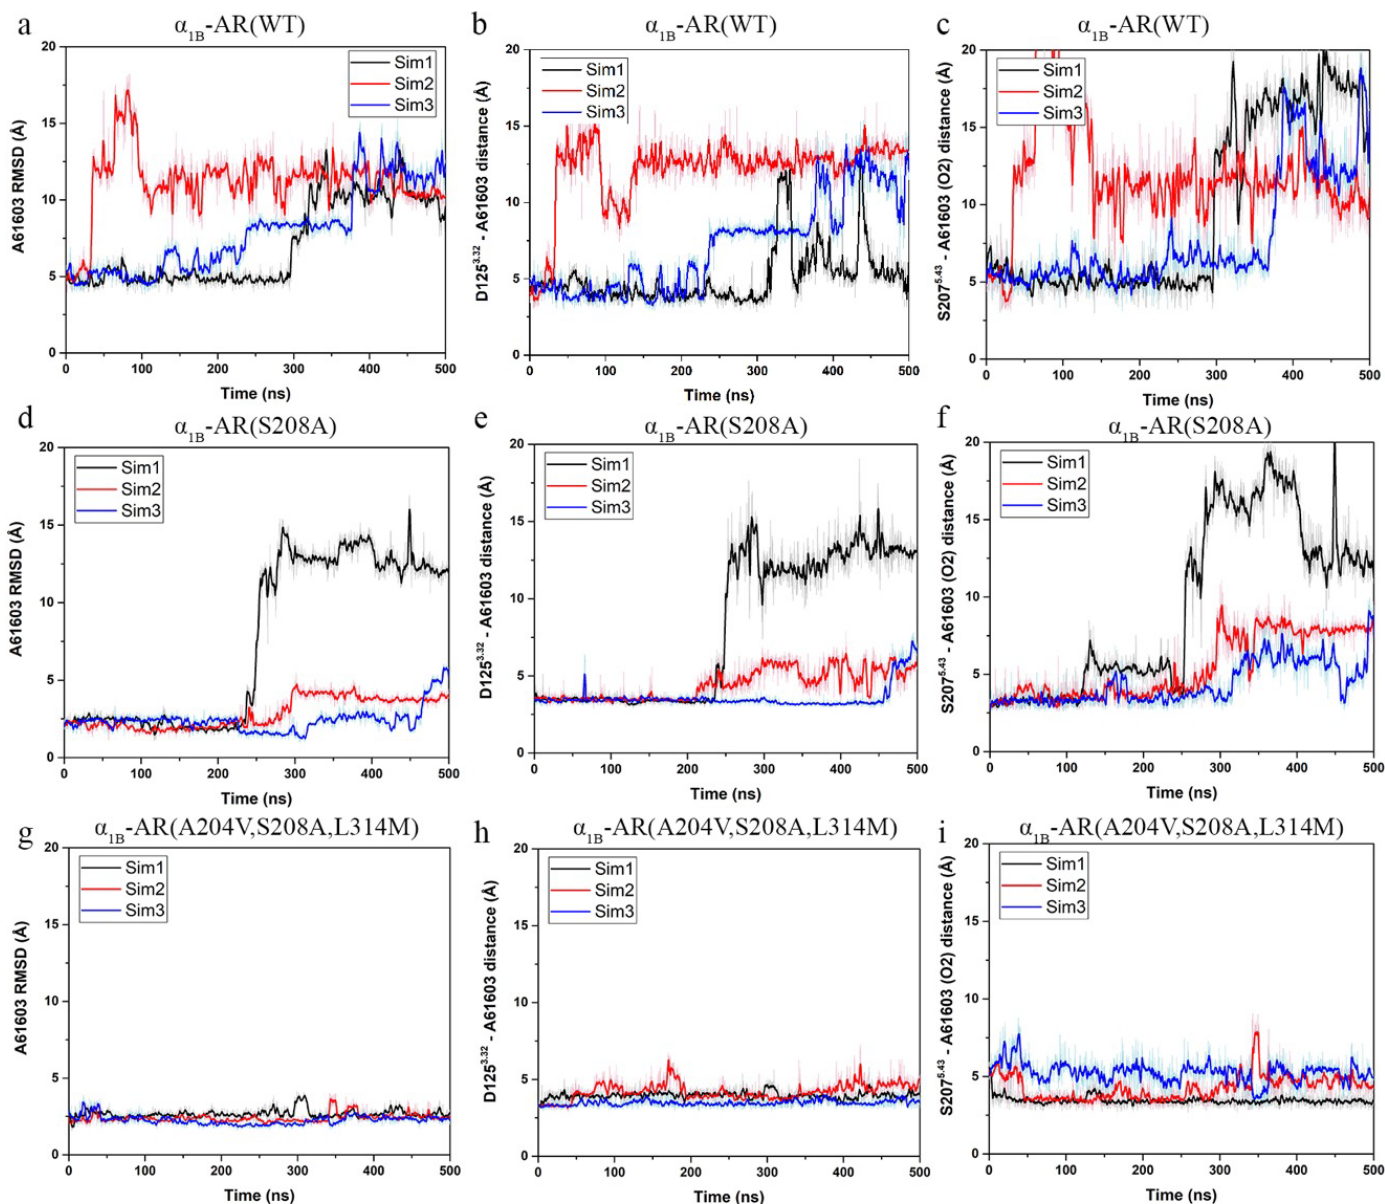

**Supplementary Figure 10. GaMD simulations of A61603 in complexes with wild-type and mutant  $\alpha_{1B}$ -ARs.**

(a, d, g) Time courses of A61603 RMSDs relative to the initial structures in the system of wild-type  $\alpha_{1B}$ -AR (a),  $\alpha_{1B}$ -AR(S208A) (d) and  $\alpha_{1B}$ -AR(A204V,S208A,L314M) (g). (b, e, h) Time courses of the distance between the CG atom of D125<sup>3,32</sup> and N2 atom of A61603 in the system of wild-type  $\alpha_{1B}$ -AR (b),  $\alpha_{1B}$ -AR(S208A) (e) and  $\alpha_{1B}$ -AR(A204V,S208A,L314M) (h). (c, f, i) Time courses of the distance between the OG atom of S207<sup>5,43</sup> and the O2 atom of A61603 in the wild-type of  $\alpha_{1B}$ -AR (c),  $\alpha_{1B}$ -AR(S208A) (f) and  $\alpha_{1B}$ -AR (A204V,S208A,L314M) (i). Three independent 500 ns GaMD simulations are shown for each condition.

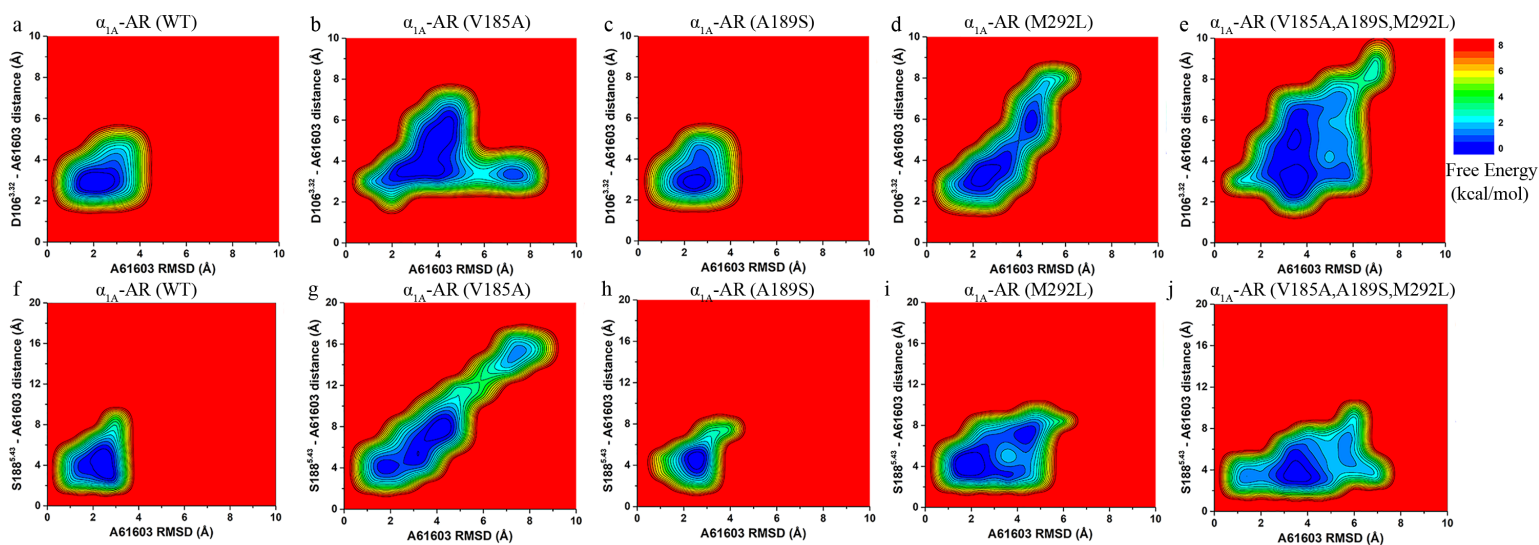

### Supplementary Figure 11. 2D free energy profiles.

(a-e) 2D free energy profiles of the A61603 RMSD relative to the distance between the CG atom of D106<sup>3.32</sup> and N2 atom of A61603 in the system of  $\alpha_{1A}$ -AR (WT) (a),  $\alpha_{1A}$ -AR (V185A) (b),  $\alpha_{1A}$ -AR(A189S) (c),  $\alpha_{1A}$ -AR(M292L) (d) and  $\alpha_{1A}$ -AR(V185A,A189S,M292L) (e). (f-j) 2D free energy profiles of the A61603 RMSD relative to the distance between the OG atom of S188<sup>5.43</sup> and O2 atom of A61603 in the system of  $\alpha_{1A}$ -AR (WT) (f),  $\alpha_{1A}$ -AR (V185A) (g),  $\alpha_{1A}$ -AR(A189S) (h),  $\alpha_{1A}$ -AR(M292L) (i) and  $\alpha_{1A}$ -AR(V185A,A189S,M292L) (j).

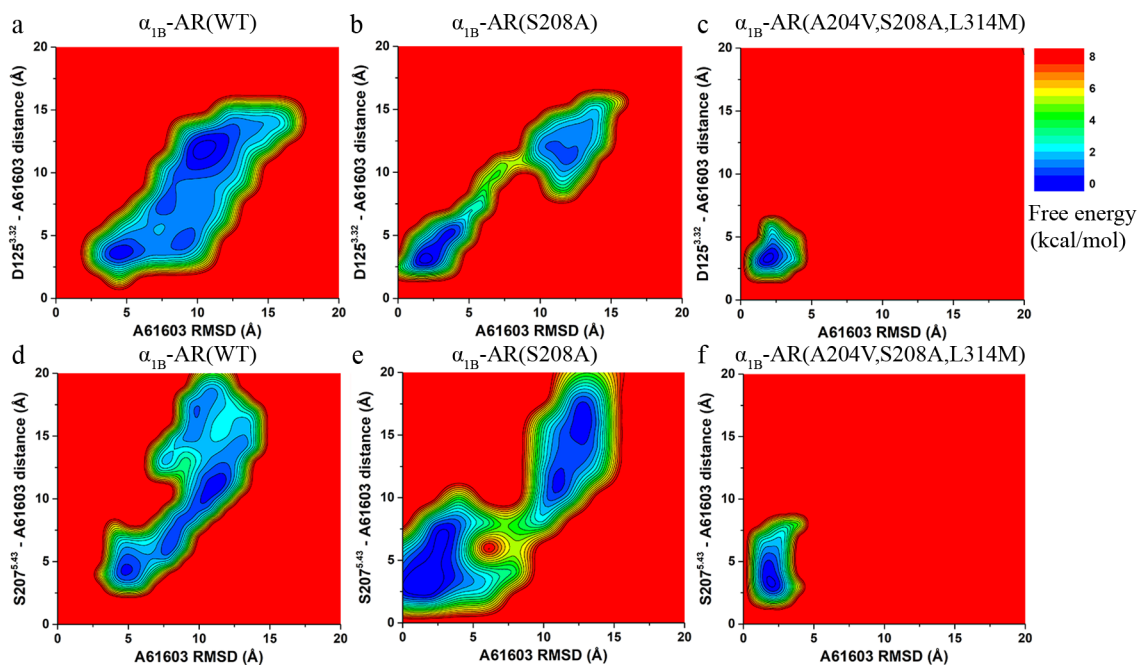

### Supplementary Figure 12. 2D free energy profiles.

(a-c) 2D free energy profiles of the A61603 RMSD relative to the distance between the CG atom of D125<sup>3,32</sup> and N2 atom of A61603 in the system of  $\alpha_{1B}$ -AR (WT) (a),  $\alpha_{1B}$ -AR (S208A) (b), and  $\alpha_{1B}$ -AR(A204V,S208A,L314M) (c). (d-f) 2D free energy profiles of the A61603 RMSD relative to the distance between the OG atom of S207<sup>5,43</sup> and O2 atom of A61603 in the system of  $\alpha_{1B}$ -AR (WT) (d),  $\alpha_{1B}$ -AR (S208A) (e), and  $\alpha_{1B}$ -AR(A204V,S208A,L314M) (f).

**Comparison of A61603 and epinephrine conformations and orientations in the complexes with  $\alpha_{1A}$ -AR and Gq**

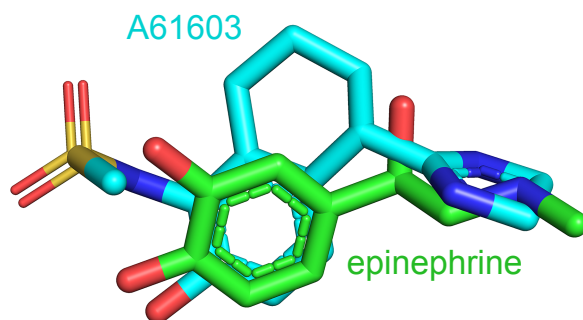

**Supplementary Figure 13. Orientations of A61603 and epinephrine in the complex structures.**

The conformations of A61603 and epinephrine in the cryo-EM structures are compared.

**Supplementary Table 1. Cryo-EM data collection, refinement and validation statistics**

|                                                               | <b>A61603-<math>\alpha_{1A}</math>-AR-Gq</b><br>(EMDB-41267)<br>(PDB 8THK) | <b>Epinephrine-<math>\alpha_{1A}</math>-AR-Gq</b><br>(EMDB-41268)<br>(PDB 8THL) |
|---------------------------------------------------------------|----------------------------------------------------------------------------|---------------------------------------------------------------------------------|
| <b>Data collection and processing</b>                         |                                                                            |                                                                                 |
| Magnification                                                 | 81,000x                                                                    | 64,000x                                                                         |
| Voltage (kV)                                                  | 300                                                                        | 300                                                                             |
| Electron exposure (e <sup>-</sup> /Å <sup>2</sup> )           | 50                                                                         | 52                                                                              |
| Defocus range (μm)                                            | -1.0 to -1.8                                                               | -1.0 to -1.8                                                                    |
| Pixel size (Å)                                                | 1.07                                                                       | 1.076                                                                           |
| Symmetry imposed                                              | C1                                                                         | C1                                                                              |
| Initial particle images (no.)                                 | 1,497,830                                                                  | 880,531                                                                         |
| Final particle images (no.)                                   | 360,489                                                                    | 219,834                                                                         |
| Map resolution (Å) (Full/ $\alpha_{1A}$ -AR-G $\alpha$ focus) | 2.62/2.86                                                                  | 3.07/3.04                                                                       |
| FSC threshold                                                 | 0.143                                                                      | 0.143                                                                           |
| <b>Refinement</b>                                             |                                                                            |                                                                                 |
| Initial model used (PDB/AlphaFoldDB code)                     | 6WHA and AF-P35348-F1                                                      | 6WHA and AF-P35348-F1                                                           |
| Model resolution (Å)                                          | 2.9/2.4                                                                    | 3.4/3.0                                                                         |
| FSC threshold                                                 | 0.50 / 0.143                                                               | 0.50 / 0.143                                                                    |
| Map sharpening <i>B</i> factor (Å <sup>2</sup> )              | -50                                                                        | -30                                                                             |
| Model composition                                             |                                                                            |                                                                                 |
| Non-hydrogen atoms                                            | 8,159                                                                      | 7,837                                                                           |
| Protein residues                                              | 1,080                                                                      | 1,080                                                                           |
| Ligands                                                       | 1                                                                          | 1                                                                               |
| <i>B</i> factors (Å <sup>2</sup> )                            |                                                                            |                                                                                 |
| Protein                                                       | 57.64                                                                      | 105.68                                                                          |
| Ligand                                                        | 48.76                                                                      | 123.23                                                                          |
| R.m.s. deviations                                             |                                                                            |                                                                                 |
| Bond lengths (Å)                                              | 0.002                                                                      | 0.003                                                                           |
| Bond angles (°)                                               | 0.478                                                                      | 0.483                                                                           |
| Validation                                                    |                                                                            |                                                                                 |
| MolProbity score                                              | 1.19                                                                       | 1.46                                                                            |
| Clashscore                                                    | 4.00                                                                       | 5.70                                                                            |
| Poor rotamers (%)                                             | 0.95                                                                       | 0.79                                                                            |
| Ramachandran plot                                             |                                                                            |                                                                                 |
| Favored (%)                                                   | 98.21                                                                      | 97.17                                                                           |
| Allowed (%)                                                   | 1.79                                                                       | 2.83                                                                            |
| Disallowed (%)                                                | 0.00                                                                       | 0                                                                               |

**Supplementary Table 2. Summary of the A61603 root-mean-square-fluctuation (RMSF) and binding free energy from MM/GBSA calculations on wild-type and mutant  $\alpha_{1A}$ -ARs and  $\alpha_{1B}$ -ARs. For each system, 1,000 frames were used for MM/GBSA calculations. Mean  $\pm$  SD are shown.**

| $\alpha_{1A}$ -AR                     |                   |                   |                   |                   |                   |
|---------------------------------------|-------------------|-------------------|-------------------|-------------------|-------------------|
| System                                | WT                | V185A             | A189S             | M292L             | V185A,A189S,M292L |
| A61603 RMSF ( $\text{\AA}$ )          | $1.46 \pm 0.10$   | $2.36 \pm 0.52$   | $1.10 \pm 0.09$   | $1.74 \pm 0.39$   | $2.58 \pm 0.33$   |
| A61603 binding free energy (kcal/mol) | $-26.73 \pm 0.22$ | $-22.18 \pm 0.73$ | $-26.54 \pm 1.89$ | $-27.88 \pm 1.53$ | $-11.52 \pm 2.47$ |
| $\alpha_{1B}$ -AR                     |                   |                   |                   |                   |                   |
| System                                | WT                | S208A             | A204V,S208A,L314M |                   |                   |
| A61603 RMSF ( $\text{\AA}$ )          | $4.28 \pm 0.30$   | $3.55 \pm 1.97$   | $0.98 \pm 0.21$   |                   |                   |
| A61603 binding free energy (kcal/mol) | $-11.52 \pm 2.47$ | $-25.81 \pm 2.67$ | $-28.21 \pm 2.80$ |                   |                   |
